# Supplementary material
Source: Springer Nature journal article supplement (https://www.springermedizin.de/resource/supplementary/12885_2008_1532_MOESM2_ESM.pdf/9472252)
Supplement: MOESM2 [file 9472252]

Additional file 2. Clinicopathological features of primary gastric carcinomas with or without *KRAS* amplification

| Characteristics                   | No. of patients (%) |                               |                               | <i>P</i> |
|-----------------------------------|---------------------|-------------------------------|-------------------------------|----------|
|                                   | Total               | <i>KRAS</i> amplification (+) | <i>KRAS</i> amplification (-) |          |
| No. of patients                   | 86                  | 4                             | 82                            |          |
| Age (yrs)                         |                     |                               |                               | 0.5086   |
| Median                            | 66                  | 60.5                          | 67                            |          |
| Range                             | 36-88               | 51-70                         | 36-88                         |          |
| Sex                               |                     |                               |                               | 1.0000   |
| Male                              | 58 (67.4)           | 3 (75.0)                      | 55 (67.1)                     |          |
| Female                            | 28 (32.6)           | 1 (25.0)                      | 27 (32.9)                     |          |
| Histology (Lauren)                |                     |                               |                               | 0.6261   |
| Intestinal                        | 39 (45.3)           | 1 (25.0)                      | 38 (46.3)                     |          |
| Diffuse                           | 47 (54.7)           | 3 (75.0)                      | 44 (53.7)                     |          |
| Histopathological grade           |                     |                               |                               | 0.5926   |
| Well differentiated               | 16 (18.6)           | 1 (25.0)                      | 15 (18.3)                     |          |
| Moderately differentiated         | 23 (26.7)           | 0 (0.0)                       | 23 (28.0)                     |          |
| Poorly differentiated             | 47 (54.7)           | 3 (75.0)                      | 44 (53.7)                     |          |
| Pathological primary tumor status |                     |                               |                               | 0.0803   |
| pT1                               | 9 (10.5)            | 1 (25.0)                      | 8 (9.8)                       |          |
| pT2                               | 42 (48.8)           | 3 (75.0)                      | 39 (47.6)                     |          |
| pT3                               | 33 (38.4)           | 0 (0.0)                       | 33 (40.2)                     |          |
| pT4                               | 2 (2.3)             | 0 (0.0)                       | 2 (2.4)                       |          |
| Pathological lymph node status    |                     |                               |                               | 0.3996   |
| pN0                               | 23 (26.7)           | 1 (25.0)                      | 22 (26.8)                     |          |
| pN1                               | 23 (26.7)           | 0 (0.0)                       | 23 (28.0)                     |          |
| pN2                               | 28 (32.6)           | 2 (50.0)                      | 26 (31.7)                     |          |
| pN3                               | 12 (14.0)           | 1 (25.0)                      | 11 (13.4)                     |          |
| Pathological metastasis status    |                     |                               |                               | 0.5799   |
| pM0                               | 68 (79.1)           | 4 (100.0)                     | 64 (78.0)                     |          |
| pM1                               | 18 (20.9)           | 0 (0.0)                       | 18 (22.0)                     |          |
| Stage (pTNM)                      |                     |                               |                               | 0.7437   |
| IA                                | 7 (8.1)             | 1 (25.0)                      | 6 (7.3)                       |          |
| IB                                | 11 (12.8)           | 0 (0.0)                       | 11 (13.4)                     |          |
| II                                | 12 (14.0)           | 0 (0.0)                       | 12 (14.6)                     |          |
| IIIA                              | 21 (24.4)           | 2 (50.0)                      | 19 (23.2)                     |          |
| IIIB                              | 7 (8.1)             | 0 (0.0)                       | 7 (8.5)                       |          |
| IV                                | 28 (32.6)           | 1 (25.0)                      | 27 (32.9)                     |          |
